# Supplementary material for: Evolution of the canonical sex chromosomes of the guppy and its relatives
Source: PubMed Central journal article supplement (PMC9335935; doi:10.1093/g3journal/jkab435), 2021-12-21
Supplement: jkab435_supplementary_data.pdf [file jkab435_supplementary_data.pdf]

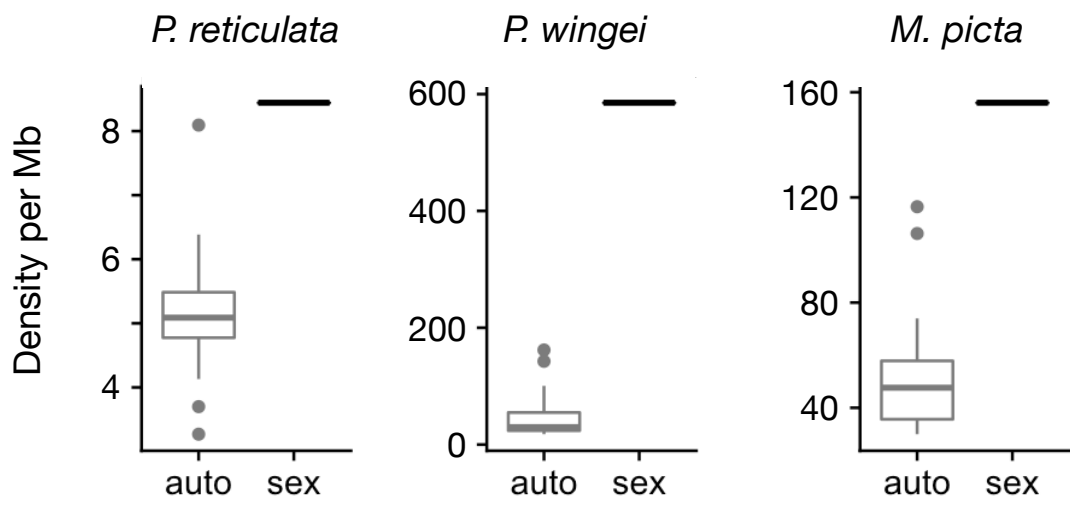

**Supplementary figure S1.** Densities of SDR-like SNPs on sex chromosomes and autosomes.
